# Supplementary material for: The influence of astrocytic leaflet motility on ionic signalling and homeostasis at active synapses
Source: PubMed Central journal article supplement (PMC9944253; doi:10.1038/s41598-023-30189-8), 2023-02-21
Supplement: 41598_2023_30189_MOESM1_ESM.pdf [file 41598_2023_30189_MOESM1_ESM.pdf]

# The influence of astrocytic leaflet motility on ionic signalling and homeostasis at active synapses – Supplementary Material

**Marinus Toman <sup>1\*</sup>, John Joseph Wade <sup>1</sup>, Alexei Verkhratsky <sup>2,3,4</sup>, Mark Dallas <sup>5</sup>, Angela Bithell <sup>5</sup>, Bronac Flanagan <sup>1</sup>, Jim Harkin <sup>1</sup> and Liam McDaid <sup>1</sup>**

<sup>1</sup> Computational Neuroscience and Neuromorphic Engineering Team, Intelligent Systems Research Centre, Ulster University, Northland Road, Derry, United Kingdom BT48 7JL

<sup>2</sup> Faculty of Biology, Medicine and Health, University of Manchester, Manchester, United Kingdom

<sup>3</sup> Achucarro Center for Neuroscience, IKERBASQUE, Basque Foundation for Science, Bilbao, Spain

<sup>4</sup> Department of Stem Cell Biology, State Research Institute Centre for Innovative Medicine, LT-01102, Vilnius, Lithuania

<sup>5</sup> Reading School of Pharmacy, University of Reading, Reading, United Kingdom

\* Corresponding author

Table 1. Transmembrane currents used in the synaptic cradle model.

| Current         | Description                                     | Equation(s)                                                                                                                    | Source                    |
|-----------------|-------------------------------------------------|--------------------------------------------------------------------------------------------------------------------------------|---------------------------|
| $I_{vgnc,pre}$  | Voltage-gated Na <sup>+</sup> channel           | $g_{vgnc,pre}m^3h(V_{pre} - E_{Na})$                                                                                           | 1                         |
| $I_{vgkc,pre}$  | Voltage-gated K <sup>+</sup> channel            | $g_{vgkc,pre}n^4(V_{pre} - E_K)$                                                                                               | 1                         |
| $I_{l,pre}$     | Background leak channel                         | $g_{l,pre}(V_{pre} - E_l)$                                                                                                     | 1                         |
| $I_{vgcc,pre}$  | Voltage-gated Ca <sup>2+</sup> channel          | $g_{vgcc,pre}s(V_{pre} - E_{Ca})$                                                                                              | 2                         |
| $\frac{dw}{dt}$ | Voltage-gated (in)activation                    | $\alpha_w(1 - w) - \beta_w w$                                                                                                  | 1                         |
| $\alpha_m$      | Na <sup>+</sup> activation forward rate         | $0.1 \left( \frac{25 - V_{pre}}{\exp\left(\frac{25 - V_{pre}}{10}\right) - 1} \right)$                                         | Adapted from <sup>1</sup> |
| $\beta_m$       | Na <sup>+</sup> activation backward rate        | $4 \left( \frac{-V_{pre}}{18} \right)$                                                                                         | Adapted from <sup>1</sup> |
| $\alpha_h$      | Na <sup>+</sup> inactivation forward rate       | $0.07 \exp\left(\frac{-V_{pre}}{20}\right)$                                                                                    | Adapted from <sup>1</sup> |
| $\beta_h$       | Na <sup>+</sup> inactivation backward rate      | $\left( \exp\left(\frac{30 - V_{pre}}{10}\right) + 1 \right)^{-1}$                                                             | Adapted from <sup>1</sup> |
| $\alpha_n$      | K <sup>+</sup> activation forward rate          | $0.1 \left( \frac{10 - V_{pre}}{\exp\left(\frac{10 - V_{pre}}{10}\right) - 1} \right)$                                         | Adapted from <sup>1</sup> |
| $\beta_n$       | K <sup>+</sup> activation backward rate         | $0.125 \left( \frac{-V_{pre}}{80} \right)$                                                                                     | Adapted from <sup>1</sup> |
| $\alpha_s$      | Ca <sup>2+</sup> activation forward rate        | $\frac{1.6}{1 + \exp(-0.072(V_{pre} - 5))}$                                                                                    | Adapted from <sup>2</sup> |
| $\beta_s$       | Ca <sup>2+</sup> activation backward rate       | $\frac{0.02(V_{pre} - 1.31)}{\exp\left(\frac{V_{pre} - 1.31}{5.36}\right) - 1}$                                                | Adapted from <sup>2</sup> |
| $I_{pmca,pre}$  | Plasma-membrane Ca <sup>2+</sup> -ATPase (PMCA) | $\bar{I}_{pmca} \left( \frac{[Ca^{2+}]_{pre}}{K_{Ca,pre} + [Ca^{2+}]_{pre}} \right)$                                           | 3                         |
| $I_{nka,y}$     | Na <sup>+</sup> -K <sup>+</sup> -ATPase (NKA)   | $\bar{I}_{nka} \left( \frac{[Na^+]_y^{1.5}}{K_{Na,y}^{1.5} + [Na^+]_y^{1.5}} \times \frac{[K^+]_y}{K_{K,y} + [K^+]_y} \right)$ | 4                         |
| $I_{ampa,post}$ | AMPA receptor                                   | $g_{ampa}r(V_{post} - E_{ampa})$                                                                                               | 5                         |
| $I_{nmda,post}$ | NMDA receptor                                   | $g_{ampa}B(V_{post})r(V_{post} - E_{ampa})$                                                                                    | 5                         |

| Current         | Description                                                  | Equation(s)                                                                                                                                                                                                                                | Source         |
|-----------------|--------------------------------------------------------------|--------------------------------------------------------------------------------------------------------------------------------------------------------------------------------------------------------------------------------------------|----------------|
| $\frac{dr}{dt}$ | AMPA/NMDA (in)activation                                     | $\alpha_r [Glu]_{ecs} (1 - r) - \beta_r r$                                                                                                                                                                                                 | 5              |
| $B(V_{post})$   | NMDA magnesium block                                         | $\left(1 + \exp(-0.062V_{post}) \frac{[Mg]_o}{3.57}\right)^{-1}$                                                                                                                                                                           | 6              |
| $I_{eaat,psc}$  | Excitatory amino-acid transporter (EAAT)                     | $\bar{I}_{eaat} \left( \frac{[Glu]_{ecs}}{K_{eaat} + [Glu]_{ecs}} \right)$                                                                                                                                                                 | -              |
| $I_{ncx,psc}$   | Na <sup>+</sup> /Ca <sup>2+</sup> exchanger (NCX)            | $\bar{I}_{ncx} \left( \left( \frac{[Na^+]_{psc}}{[Na^+]_{ecs}} \right)^3 \exp\left(\frac{\gamma F V_{psc}}{RT}\right) - \left( \frac{[Ca^{2+}]_{psc}}{[Ca^{2+}]_{ecs}} \right) \exp\left(\frac{(\gamma - 1) F V_{psc}}{RT}\right) \right)$ | 4,7            |
| $I_{kir,psc}$   | K <sup>+</sup> inward rectifier channel (K <sub>i</sub> 4.1) | $g_{kir} \sqrt{[K^+]_{ecs}} (V_{psc} - E_{kir})$                                                                                                                                                                                           | 8              |
| $I_{pf,x}$      | Leaflet diffusion                                            | $K_{pf,x} \frac{-E_x}{l_{lf}} \exp\left(-\frac{Q \left( \varphi - \sqrt{\frac{Q(-E_x)}{l_{lf} \pi \epsilon}} \right)}{k_B T}\right)$                                                                                                       | Adapted from 9 |
| $I_{l,x,y}$     | Passive channels                                             | $g_{l,x,y} (V_y - E_x)$                                                                                                                                                                                                                    | 3              |
| $I_{ecs,x}$     | ECS diffusion                                                | $g_{ecs} \lambda (-E_{x,ecs})$                                                                                                                                                                                                             | 10             |
| $E_x$           | Equilibrium potential                                        | $\frac{RT}{z_x F} \ln \frac{[x]_o}{[x]_i}$                                                                                                                                                                                                 | 3              |

Note:  $w \in \{m, h, n, s\}$ ,  $x \in \{Na, K, Ca\}$  and  $y \in \{pre, post, psc\}$

Table 2. Parameters used in the synaptic cradle model.

| Parameter                  | Description                 | Value                    | Unit(s) | Source |
|----------------------------|-----------------------------|--------------------------|---------|--------|
| <b>Constants</b>           |                             |                          |         |        |
| $dt$                       | Time step                   | 10                       | μs      | -      |
| $F$                        | Faraday's constant          | 96485                    | C/mol   | -      |
| $R$                        | Idela gas constant          | 8.314                    | J/mol.K | -      |
| $k_B$                      | Boltzmann's constant        | $1.38 \times 10^{-23}$   | J/K     | -      |
| $T$                        | Absolute temperature        | 310                      | K       | -      |
| $Q$                        | Elementary charge           | $1.6002 \times 10^{-19}$ | C       | -      |
| $z_K$                      | Valency of K <sup>+</sup>   | 1                        | -       | -      |
| $z_{Na}$                   | Valency of Na <sup>+</sup>  | 1                        | -       | -      |
| $z_{Ca}$                   | Valency of Ca <sup>2+</sup> | 2                        | -       | -      |
| <b>Neuronal parameters</b> |                             |                          |         |        |

| Parameter                    | Description                            | Value                                                            | Unit(s)                         | Source                    |
|------------------------------|----------------------------------------|------------------------------------------------------------------|---------------------------------|---------------------------|
| $V_{pre}$                    | Presynaptic membrane potential         | -70                                                              | mV                              | -                         |
| $V_{post}$                   | Postsynaptic membrane potential        | -70                                                              | mV                              | -                         |
| $C_m$                        | Membrane capacitance                   | 0.01                                                             | F/m <sup>2</sup>                | 1                         |
| $g_{vgnc,pre}$               | Maximal Na <sup>+</sup> conductance    | 120                                                              | mS/cm <sup>2</sup>              | 1                         |
| $E_{Na}$                     | Na <sup>+</sup> equilibrium potential  | 45                                                               | mV                              | Adapted from <sup>1</sup> |
| $g_{vgkc,pre}$               | Maximal K <sup>+</sup> conductance     | 36                                                               | mS/cm <sup>2</sup>              | 1                         |
| $E_K$                        | K <sup>+</sup> equilibrium potential   | -82                                                              | mV                              | Adapted from <sup>1</sup> |
| $g_{vgcc,pre}$               | Maximal Ca <sup>2+</sup> conductance   | 0.1                                                              | mS/cm <sup>2</sup>              | Adapted from <sup>2</sup> |
| $E_{Ca}$                     | Ca <sup>2+</sup> equilibrium potential | $\frac{RT}{z_{Ca}F} \ln \frac{[Ca^{2+}]_{ecs}}{[Ca^{2+}]_{pre}}$ | V                               | -                         |
| $g_{l,pre}$                  | Maximal leak conductance               | 0.3                                                              | mS/cm <sup>2</sup>              | 1                         |
| $E_l$                        | Leak equilibrium potential             | -59                                                              | mV                              | Adapted from <sup>1</sup> |
| $V_{max}$                    | Maximal PMCA velocity                  | $0.2 \times 10^{-6}$                                             | mol/m <sup>2</sup> s            | 3                         |
| $\bar{I}_{pmca}$             | Maximal PMCA current                   | $V_{max}F$                                                       | A/m <sup>2</sup>                | 3                         |
| $K_{Ca,pre}$                 | PMCA Ca <sup>2+</sup> affinity         | 0.2                                                              | μM                              | 3                         |
| $P_{max}$                    | Maximal NKA velocity                   | $1.12 \times 10^{-2}$                                            | mol/m <sup>2</sup> s            | 4                         |
| $\bar{I}_{nka}$              | Maximal NKA current                    | $P_{max}F$                                                       | A/m <sup>2</sup>                | 4                         |
| $K_{Na,pre/post}$            | NKA Na <sup>+</sup> affinity           | 10                                                               | mM                              | 14                        |
| $K_{K,pre/post}$             | NKA K <sup>+</sup> affinity            | 0.6                                                              | mM                              | 14                        |
| $g_{ampa}$                   | Maximal AMPA conductance               | 0.18                                                             | S/m <sup>2</sup>                | 5                         |
| $E_{ampa}$                   | AMPA equilibrium potential             | 0                                                                | mV                              | 5                         |
| $\alpha_{ampa}$              | AMPA activation rate                   | $1.1 \times 10^6$                                                | M <sup>-1</sup> s <sup>-1</sup> | 5                         |
| $\beta_{ampa}$               | AMPA inactivation rate                 | 190                                                              | s <sup>-1</sup>                 | 5                         |
| $g_{nmda}$                   | Maximal NMDA conductance               | 0.26                                                             | S/m <sup>2</sup>                | 6                         |
| $E_{nmda}$                   | NMDA equilibrium potential             | 0                                                                | mV                              | 6                         |
| $\alpha_{nmda}$              | NMDA activation rate                   | $7.4 \times 10^4$                                                | M <sup>-1</sup> s <sup>-1</sup> | 6                         |
| $\beta_{nmda}$               | NMDA inactivation rate                 | 6.6                                                              | s <sup>-1</sup>                 | 6                         |
| $g_{l,Na,pre}$               | Na <sup>+</sup> leak conductance       | 1.4184                                                           | S/m <sup>2</sup>                | Calculated                |
| $g_{l,K,pre}$                | K <sup>+</sup> leak conductance        | 7.6113                                                           | S/m <sup>2</sup>                | Calculated                |
| $g_{l,Ca,pre}$               | Ca <sup>2+</sup> leak conductance      | 0.0186                                                           | S/m <sup>2</sup>                | Calculated                |
| $g_{l,Na,post}$              | Na <sup>+</sup> leak conductance       | 1.4184                                                           | S/m <sup>2</sup>                | Calculated                |
| $g_{l,K,post}$               | K <sup>+</sup> leak conductance        | 7.6113                                                           | S/m <sup>2</sup>                | Calculated                |
| $g_{l,Ca,post}$              | Ca <sup>2+</sup> leak conductance      | 0.0186                                                           | S/m <sup>2</sup>                | Calculated                |
| <b>Astrocytic parameters</b> |                                        |                                                                  |                                 |                           |

| Parameter                       | Description                               | Value                                                  | Unit(s)              | Source     |
|---------------------------------|-------------------------------------------|--------------------------------------------------------|----------------------|------------|
| $V_{psc}$                       | Membrane potential                        | -80.7                                                  | mV                   | 10         |
| $V_{eaat}$                      | Maximal EAAT velocity                     | $3 \times 10^{-6}$                                     | mol/m <sup>2</sup> s | 11         |
| $eff_{eaat}$                    | Average EAAT efficiency                   | 0.5                                                    | -                    | 12         |
| $\bar{I}_{eaat}$                | Maximal EAAT current                      | $V_{eaat} eff_{eaat} F$                                | A/m <sup>2</sup>     | -          |
| $K_{eaat}$                      | EAAT Glu affinity                         | 20                                                     | μM                   | 13         |
| $K_{Na,psc}$                    | NKA Na <sup>+</sup> affinity              | 10                                                     | mM                   | 14         |
| $K_{K,psc}$                     | NKA K <sup>+</sup> affinity               | 3.6                                                    | mM                   | 14         |
| $\bar{I}_{ncx}$                 | Maximal NCX current                       | 1                                                      | A/m <sup>2</sup>     | 7          |
| $\gamma$                        | NCX energy partition                      | 0.5                                                    | -                    | 7          |
| $g_{kir}$                       | Maximal K <sub>ir</sub> 4.1 conductance   | 144                                                    | S/m <sup>2</sup>     | 10         |
| $E_{kir}$                       | K <sub>ir</sub> 4.1 equilibrium potential | $\frac{RT}{z_K F} \ln \frac{[K^+]_{ecs}}{[K^+]_{psc}}$ | V                    | -          |
| $K_{pf}$                        | Poole-Frenkel channel constant            | 0.018                                                  | S/m                  | 9          |
| $\varphi$                       | Well activation energy                    | 10                                                     | J                    | 9          |
| $\epsilon$                      | Dynamic permittivity                      | $\epsilon_0 \epsilon_r$                                | -                    | 9          |
| $\epsilon_0$                    | Vacuum permittivity                       | $8.85 \times 10^{-12}$                                 | F/m                  | 9          |
| $\epsilon_r$                    | Relative permittivity of brain tissue     | 0.82                                                   | F/m                  | 9          |
| $g_{l,Na,psc}$                  | Na <sup>+</sup> leak conductance          | 2.3771                                                 | S/m <sup>2</sup>     | Calculated |
| $g_{l,K,psc}$                   | K <sup>+</sup> leak conductance           | 33.0159                                                | S/m <sup>2</sup>     | Calculated |
| $g_{l,Ca,psc}$                  | Ca <sup>2+</sup> leak conductance         | $1.6 \times 10^{-11}$                                  | S/m <sup>2</sup>     | Calculated |
| <b>Extracellular parameters</b> |                                           |                                                        |                      |            |
| $g_{ecs}$                       | Maximal diffusion conductance             | 1                                                      | S/m <sup>2</sup>     | 10         |
| $\lambda$                       | Conductance scaling factor                | 10                                                     | -                    | -          |
| $E_{x,ecs}$                     | ECS equilibrium potential                 | $\frac{RT}{z_x F} \ln \frac{[x]_{gecs}}{[x]_{ecs}}$    | V                    | 10         |
| <b>Concentrations</b>           |                                           |                                                        |                      |            |
| $[K^+]_{psc}$                   | Initial K <sup>+</sup> in PsC             | 100                                                    | mM                   | 14         |
| $[K^+]_{ecs}$                   | Initial K <sup>+</sup> in ECS             | 4                                                      | mM                   | 14         |
| $[K^+]_{pre}$                   | K <sup>+</sup> in Pre                     | 100                                                    | mM                   | 14         |
| $[K^+]_{post}$                  | K <sup>+</sup> in Post                    | 100                                                    | mM                   | 14         |
| $[K^+]_{gecs}$                  | K <sup>+</sup> in GECS                    | 4                                                      | mM                   | 14         |
| $[Na^+]_{psc}$                  | Initial Na <sup>+</sup> in PsC            | 15                                                     | mM                   | 14         |
| $[Na^+]_{ecs}$                  | Initial Na <sup>+</sup> in ECS            | 135                                                    | mM                   | 14         |
| $[Na^+]_{pre}$                  | Na <sup>+</sup> in Pre                    | 15                                                     | mM                   | 14         |

| <b>Parameter</b>             | <b>Description</b>              | <b>Value</b> | <b>Unit(s)</b>  | <b>Source</b> |
|------------------------------|---------------------------------|--------------|-----------------|---------------|
| $[Na^+]_{post}$              | Na <sup>+</sup> in Post         | 15           | mM              | 14            |
| $[Na^+]_{gecs}$              | Na <sup>+</sup> in GECS         | 135          | mM              | 14            |
| $[Ca^{2+}]_{psc}$            | Initial Ca <sup>2+</sup> in PsC | 100          | nM              | 14            |
| $[Ca^{2+}]_{ecs}$            | Initial Ca <sup>2+</sup> in ECS | 1.5          | mM              | 14            |
| $[Ca^{2+}]_{pre}$            | Initial Ca <sup>2+</sup> in Pre | 50           | nM              | 14            |
| $[Ca^{2+}]_{post}$           | Ca <sup>2+</sup> in Post        | 50           | nM              | 14            |
| $[Ca^{2+}]_{gecs}$           | Ca <sup>2+</sup> in GECS        | 1.5          | mM              | 14            |
| <b>Morphology parameters</b> |                                 |              |                 |               |
| $Vol_{psc}$                  | PsC volume                      | 0.031416     | fL              | Calculated    |
| $Vol_{pre}$                  | Pre volume                      | 0.014314     | fL              | Calculated    |
| $Vol_{post}$                 | Post volume                     | 0.014314     | fL              | Calculated    |
| $Vol_{ecs,a}$                | ECS volume (A configuration)    | 0.001145     | fL              | Calculated    |
| $Vol_{ecs,b}$                | ECS volume (B configuration)    | 0.00786      | fL              | Calculated    |
| $Vol_{ecs,c}$                | ECS volume (C configuration)    | 0.055022     | fL              | Calculated    |
| $SA_{psc}$                   | PsC surface area                | 0.23562      | $\mu\text{m}^2$ | Calculated    |
| $SA_{pre}$                   | Pre surface area                | 0.21206      | $\mu\text{m}^2$ | Calculated    |
| $SA_{post}$                  | Post surface area               | 0.21206      | $\mu\text{m}^2$ | Calculated    |
| $SA_{ecs}$                   | ECS diffusion surface area      | 0.015        | $\mu\text{m}^2$ | Calculated    |
| $CSA_{lf}$                   | Leaflet cross-sectional area    | 0.007854     | $\mu\text{m}^2$ | Calculated    |
| $l_{lf}$                     | Leaflet length                  | 2            | $\mu\text{m}$   | -             |

## References

1. Hodgkin, A. L. & Huxley, A. F. A quantitative description of membrane current and its application to conduction and excitation in nerve. *J. Physiol.* **117**, 500–44 (1952).
2. Mirzakhali, E., Epureanu, B. I. & Gourgou, E. A mathematical and computational model of the calcium dynamics in *Caenorhabditis elegans* ASH sensory neuron. *PLoS One* **13**, e0201302 (2018).
3. Keener, J. & Sneyd, J. *Mathematical Physiology*. vol. 8/1 (Springer New York, 2009).
4. Gabbiani, F. & Cox, S. J. *Mathematics for Neuroscientists. Mathematics for Neuroscientists* (Elsevier, 2010). doi:10.1016/C2009-0-01867-4.
5. Destexhe, A. Kinetic Models of Postsynaptic Currents. in *Encyclopedia of Computational Neuroscience* 1–6 (Springer New York, 2014). doi:10.1007/978-1-4614-7320-6\_355-1.
6. Jahr, C. & Stevens, C. Voltage dependence of NMDA-activated macroscopic conductances predicted by single-channel kinetics. *J. Neurosci.* **10**, 3178–3182 (1990).
7. Sterratt, D., Graham, B., Gillies, A. & Willshaw, D. *Principles of Computational Modelling in Neuroscience*. (2011).
8. Witthoft, A., Filosa, J. A. & Karniadakis, G. E. Potassium buffering in the neurovascular unit: models and sensitivity analysis. *Biophys. J.* **105**, 2046–54 (2013).
9. Breslin, K. *et al.* Potassium and sodium microdomains in thin astroglial processes: A computational model study. *PLOS Comput. Biol.* **14**, e1006151 (2018).
10. Wade, J. J. *et al.* Calcium Microdomain Formation at the Perisynaptic Cradle Due to NCX Reversal: A Computational Study. *Front. Cell. Neurosci.* **13**, (2019).
11. Marcaggi, P. & Attwell, D. Role of glial amino acid transporters in synaptic transmission and brain energetics. *Glia* **47**, 217–225 (2004).
12. Vandenberg, R. J. & Ryan, R. M. Mechanisms of Glutamate Transport. *Physiol. Rev.* **93**, 1621–1657 (2013).
13. Tzingounis, A. V. & Wadiche, J. I. Glutamate transporters: confining runaway excitation by shaping synaptic transmission. *Nat. Rev. Neurosci.* **8**, 935–947 (2007).
14. Verkhratsky, A. & Nedergaard, M. Physiology of Astroglia. *Physiol. Rev.* **98**, 239–389 (2018).
